# Supplementary material for: Lumican delays melanoma growth in mice and drives tumor molecular assembly as well as response to matrix-targeted TAX2 therapeutic peptide
Source: PubMed Central journal article supplement (PMC5550434; doi:10.1038/s41598-017-07043-9), 2017-08-09
Supplement: 41598_2017_7043_MOESM1_ESM.pdf [file 41598_2017_7043_MOESM1_ESM.pdf]

**Lumican delays melanoma growth in mice and drives tumor molecular assembly as well as response to matrix-targeted TAX2 therapeutic peptide.**

Albin Jeanne<sup>1,2,3</sup>, Valérie Untereiner<sup>2,4</sup>, Corinne Perreau<sup>2,5</sup>, Isabelle Proult<sup>2,5</sup>, Cyril Gobinet<sup>2,6</sup>, Camille Boulagnon-Rombi<sup>2,7</sup>, Christine Terryn<sup>4</sup>, Laurent Martiny<sup>1,2</sup>, Stéphane Brézillon<sup>2,5</sup> and Stéphane Dedieu<sup>1,2\*</sup>.

**SUPPLEMENTARY INFORMATION**

## Supporting information captions

### **Fig S1. *COL1A2* and *MMP14* are co-expressed with *LUM* in human melanoma and both correlate with outcome.**

(a) *COL1A2* and *MMP14* encoding genes were retrieved within *LUM* interaction network queried from the Human Protein Reference Database HPRD<sup>79</sup>. Heatmap depicts relative expression of *LUM*, *COL1A2* and *MMP14* genes in cutaneous melanoma vs. normal skin, revealed using Talantov dataset<sup>80</sup> from Oncomine DB<sup>81</sup>. (b-c) High *COL1A2* mRNA (b) and low *MMP14* mRNA (c) expression is associated with improved survival in patients with melanoma. Kaplan-Meier analyses for overall survival rates of 44 melanoma patients were performed among Bhardwaj dataset<sup>26</sup> (GEO accession number GSE19234) using the R2 web tool as described in Materials and Methods.

### **Fig S2. Analysis of normal skin features in *Lum*<sup>+/+</sup> (WT) vs. *Lum*<sup>-/-</sup> mice.**

(a) Representative micrographs ( $\times 20$ ) of HES-stained sections through contralateral skin surfaces of *Lum*<sup>+/+</sup> (WT) vs. *Lum*<sup>-/-</sup> mice. Note skin thickening in *Lum*<sup>-/-</sup> mice which is associated with a deeper dermis layer while epidermis becomes thinner (*black double arrow*). Lumican-null phenotype also correlates with larger and disorganized collagen fibers (*blue arrows*). (b) Representative polarized light micrographs, using crossed polars, of picrosirius red-stained normal skin sections (original magnification  $\times 63$ ). (c) Representative collagen SHG images (original magnification  $\times 20$ ). (d-f) Quantification of the relative distribution of (d) red (type I collagen fibers) and (e) green (type III collagen fibers) pixels within normal skin picrosirius-stained images, and corresponding (f) averaged type I/type III ratio calculations (mean  $\pm$  SEM, *t* test, ns not significant). (g) Collagen orientation index determination from images of picrosirius-stained polarized images of normal skin processed through Gabor filtering and FFT (mean  $\pm$  SEM, *t* test, \*\*\*  $p < 0.001$ ). (h) Collagen density of skin SHG images for *Lum*<sup>+/+</sup> vs. *Lum*<sup>-/-</sup> animals (mean  $\pm$  SEM, *t* test, ns not significant). (i) Representative polar plots of SHG intensity vs. angle of laser polarization.

Fig.S1

a

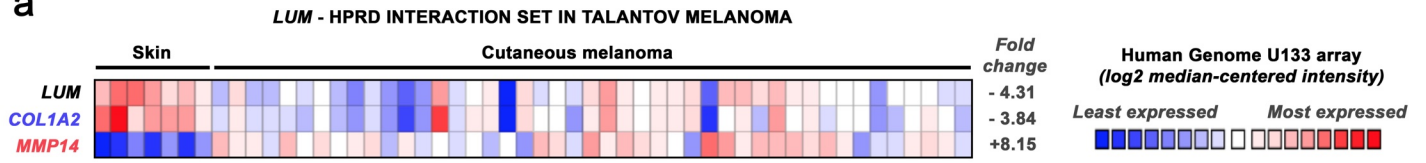

b

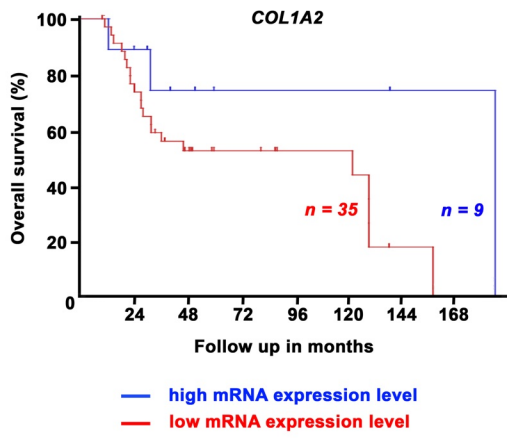

c

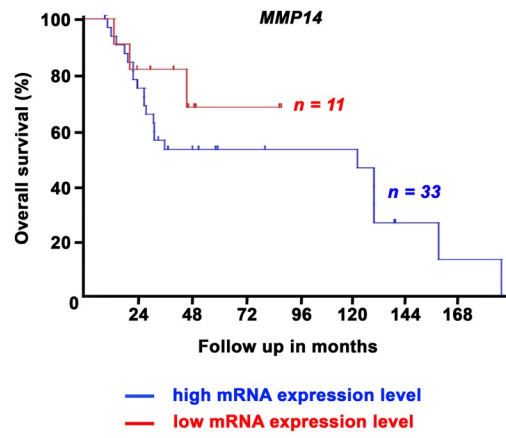

Fig.S2

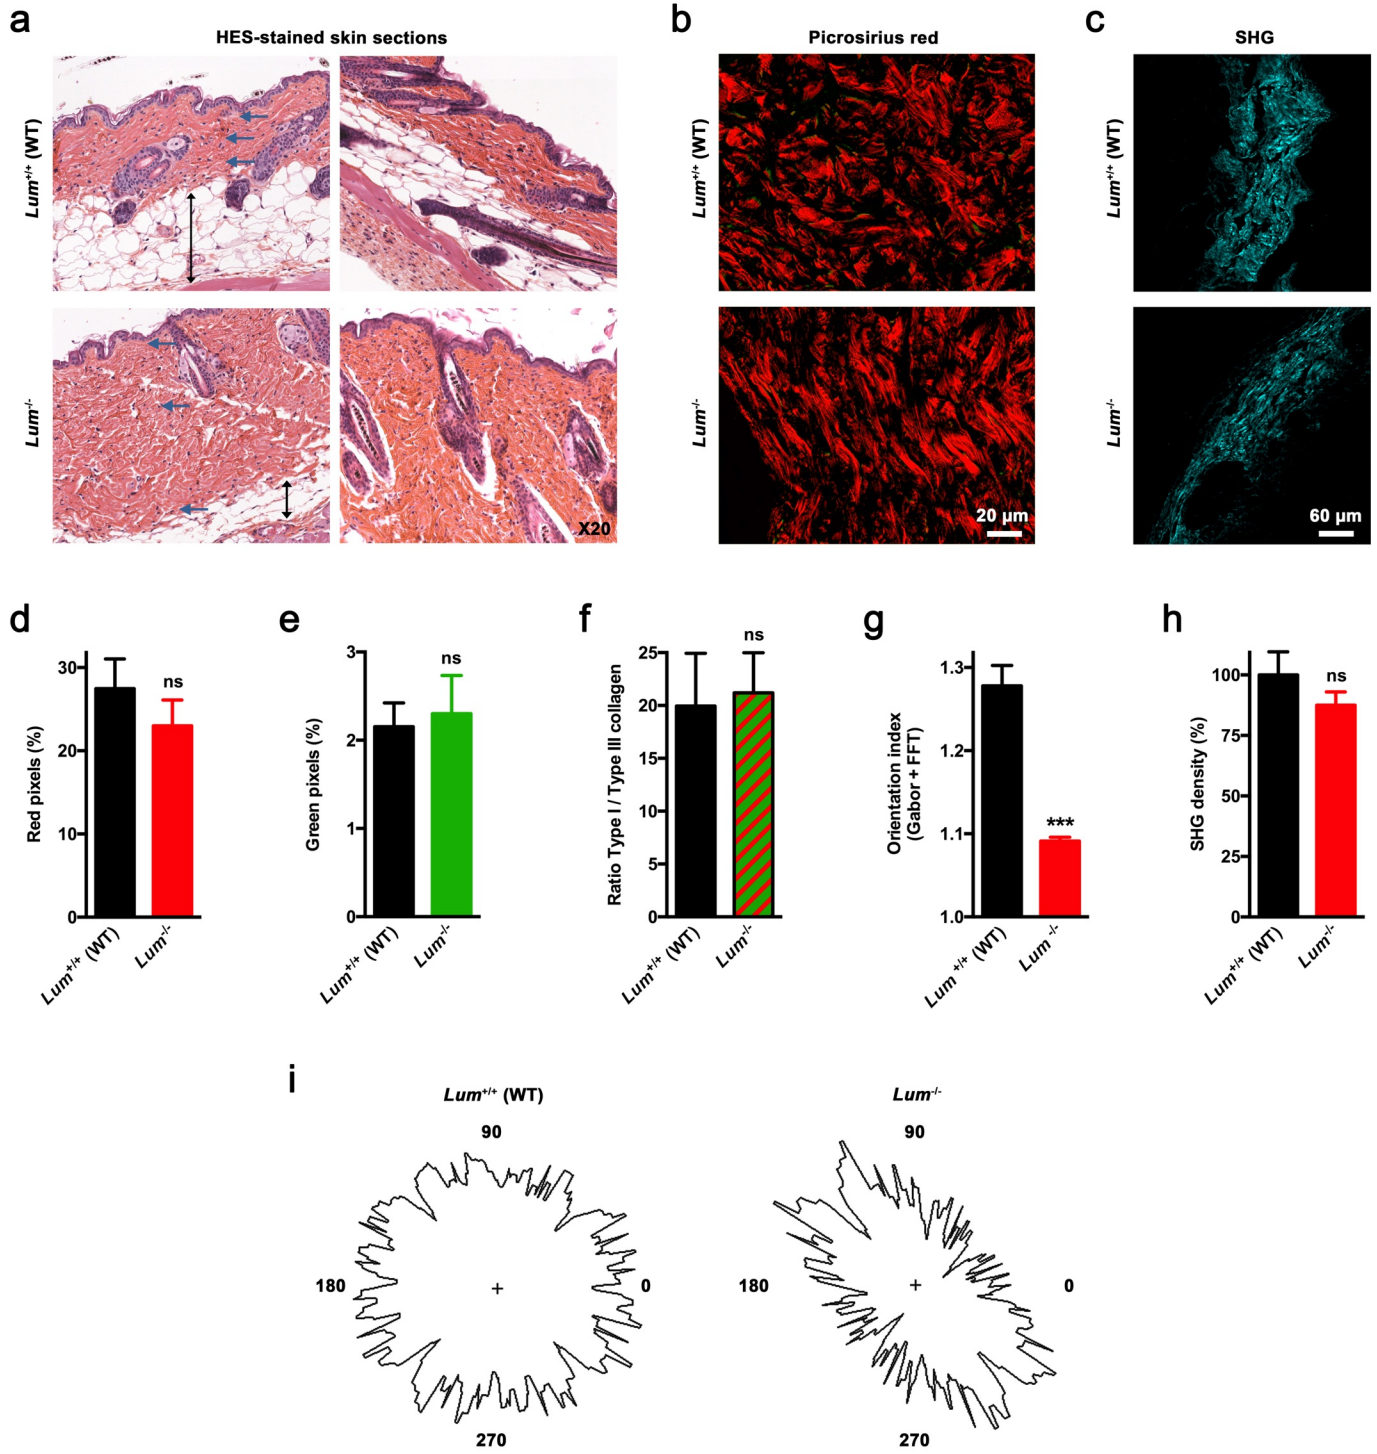

## References

79. Keshava Prasad, T. S. *et al.* Human Protein Reference Database-2009 update. *Nucleic Acids Res.* **37**, D767-D772 (2009).
80. Talantov, D. *et al.* Novel genes associated with malignant melanoma but not benign melanocytic lesions. *Clin. Cancer Res.* **11**, 7234-7242 (2005).
81. Rhodes, D. R. *et al.* Oncomine 3.0: genes, pathways, and networks in a collection of 18,000 cancer gene expression profiles. *Neoplasia* **9**, 166-180 (2007).
